# Supplementary material
Source: Springer Nature journal article supplement (https://www.springermedizin.de/resource/supplementary/12885_2008_1367_MOESM1_ESM.pdf/9472594)

- *Early* HCC (465 pts)  
- *Very early* HCC (65 pts)

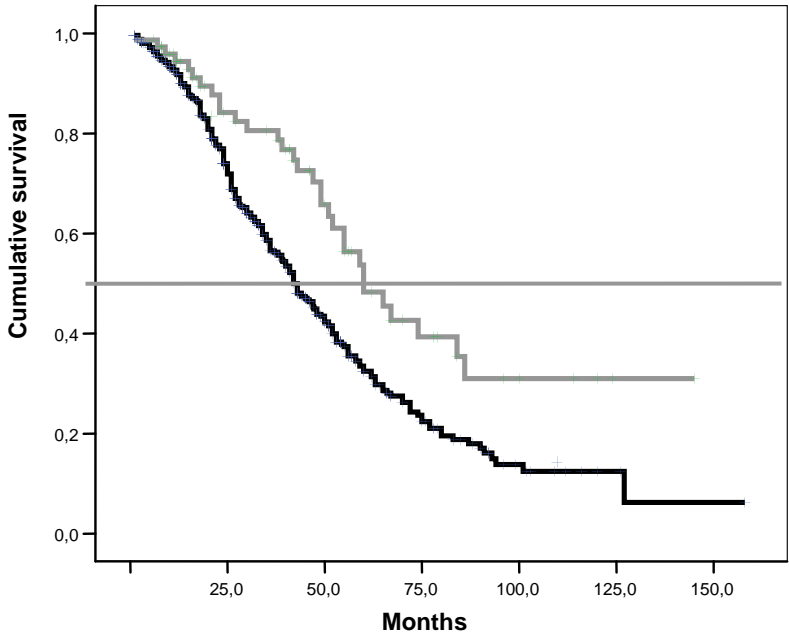

p = 0.003  
Chi<sup>2</sup> = 8.284

Supplement: MOESM1 [file 9472594]
